# Supplementary material for: Early opportunity signals of a tipping point in the UK’s second-hand electric vehicle market
Source: Copernicus journal article supplement (doi:10.5194/egusphere-2023-2234), 2023-10-05

# Every-electric vehicles market share in European countries in Q1 2024

ACEA (2024) Alternative Fuel Vehicle Registrations Data.

market share ● BEV volume

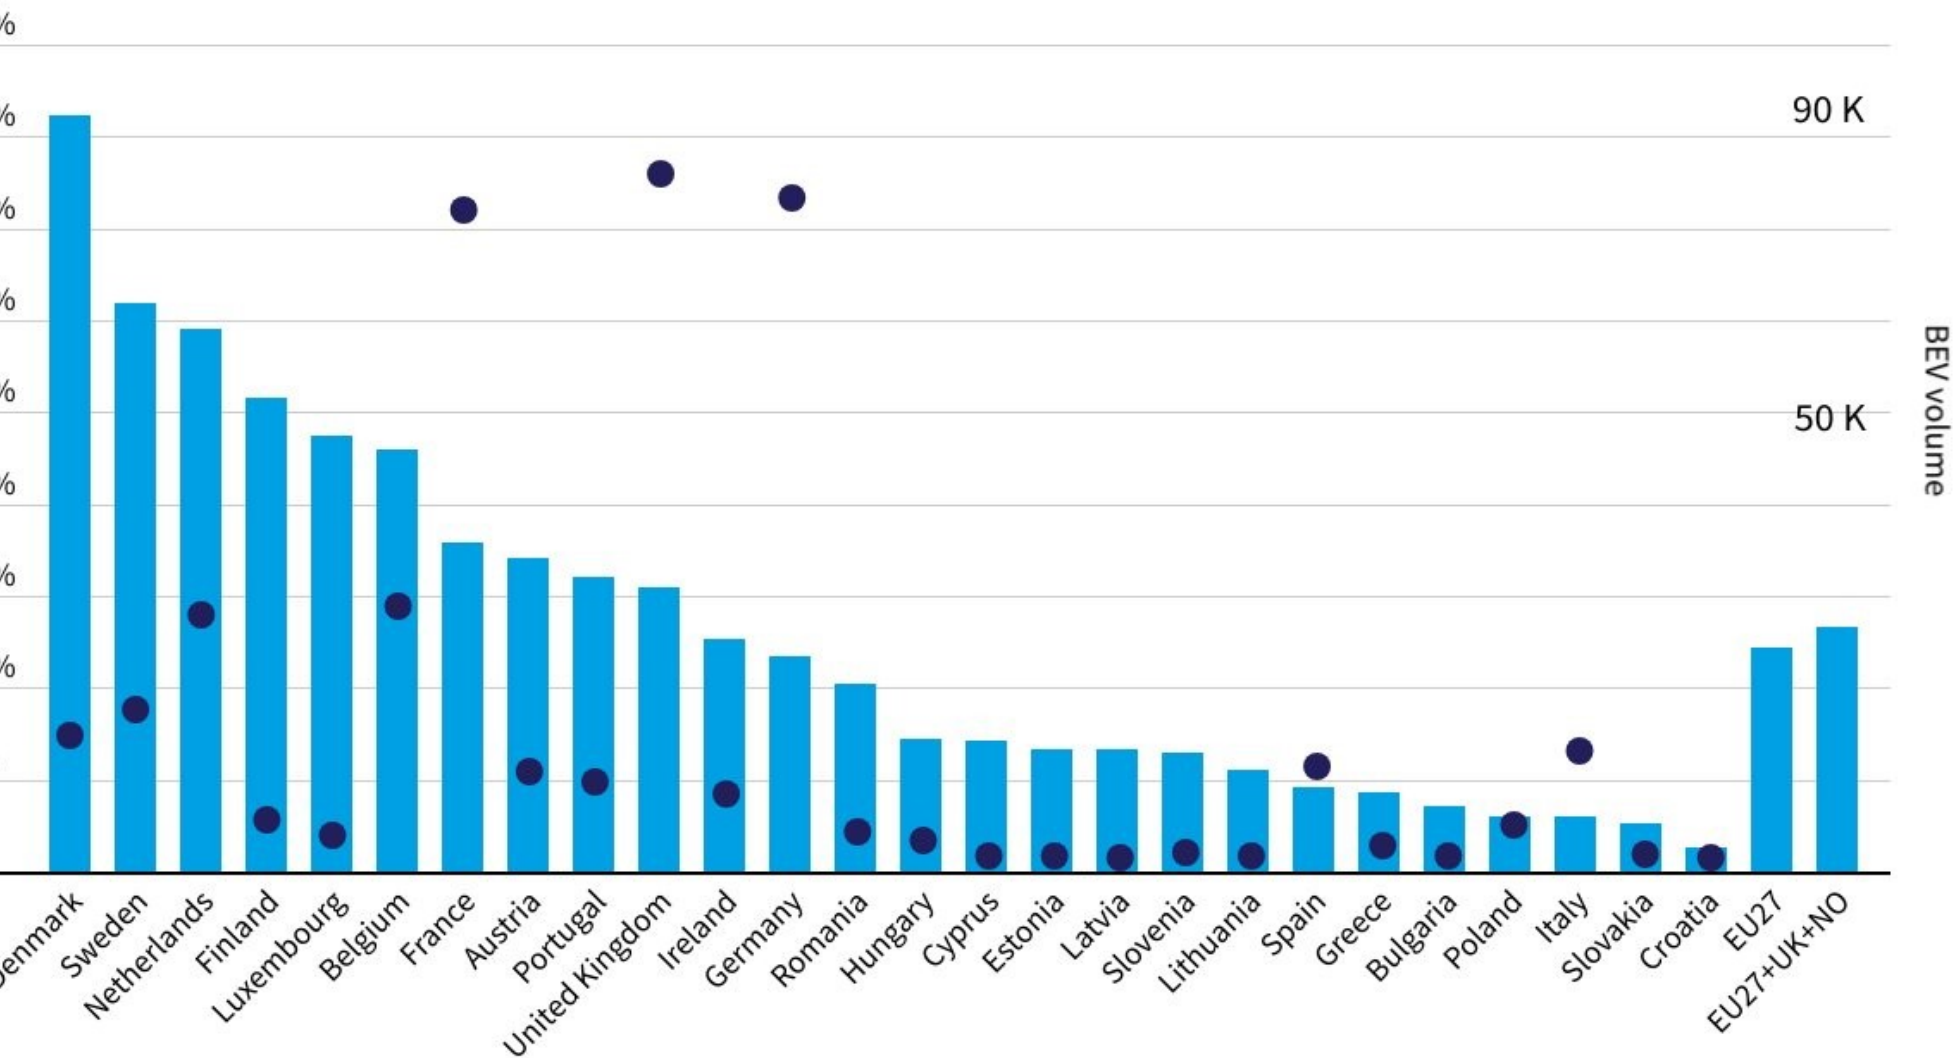

Supplement: Supplementary file [file egusphere-2023-2234-RC2-supplement.pdf]
